# Supplementary material
Source: Royal Society of Chemistry journal article supplement (doi:10.1039/d6bm00176a)
Supplement: d6bm00176a1.pdf [file d6bm00176a1.pdf]

## Supplementary material

### **Synergies of submicron/microporous structures and gallium phytate coating on polyetherketoneketone composite for facilitating synostosis and resisting infection**

Ping Sun<sup>a, c</sup>, Ye Ying<sup>a</sup>, Shangyu Xie<sup>a</sup>, Guanghui Wang<sup>a</sup>, Jie Wei<sup>a\*</sup>, Yunfei Niu<sup>b, d\*</sup>

<sup>a</sup> Shanghai Key Laboratory of Advanced Polymeric Materials, School of Materials Science and Engineering, East China University of Science and Technology, 200237, China

<sup>b</sup>Department of Trauma Orthopaedics, the first affiliated hospital of Naval Medical University, Shanghai 200433, China

<sup>c</sup> Department of Orthopedics, Shanghai Eighth People's Hospital, Shanghai, 200235, China

<sup>d</sup>Department of Orthopaedics, Shidong Hospital affiliated to University of Shanghai for Science and Technology, Shanghai 200438, China

\* Corresponding authors.

E-mail address: jiewei7860@sina.com (Jie Wei), nyunfei1219@163.com (Yunfei Niu)

sunping1127@126.com (P. Sun).

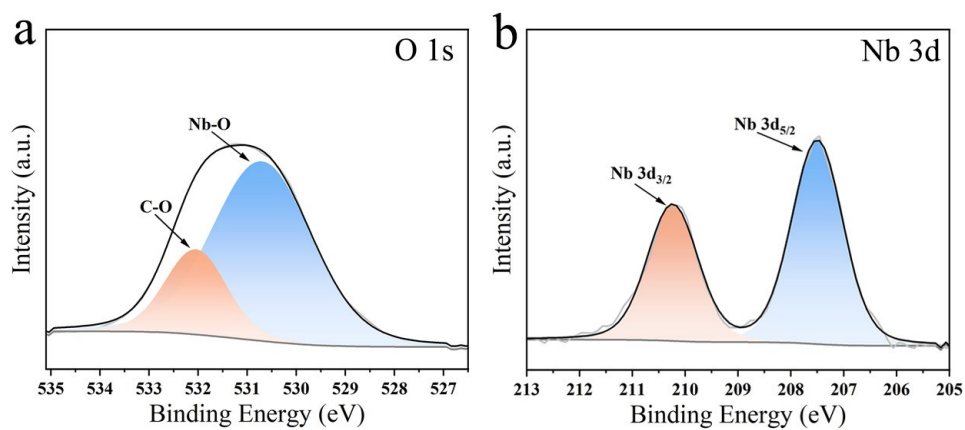

Fig. S1 High-resolution XPS of O 1s (a) and Nb 3d (b) of NP.

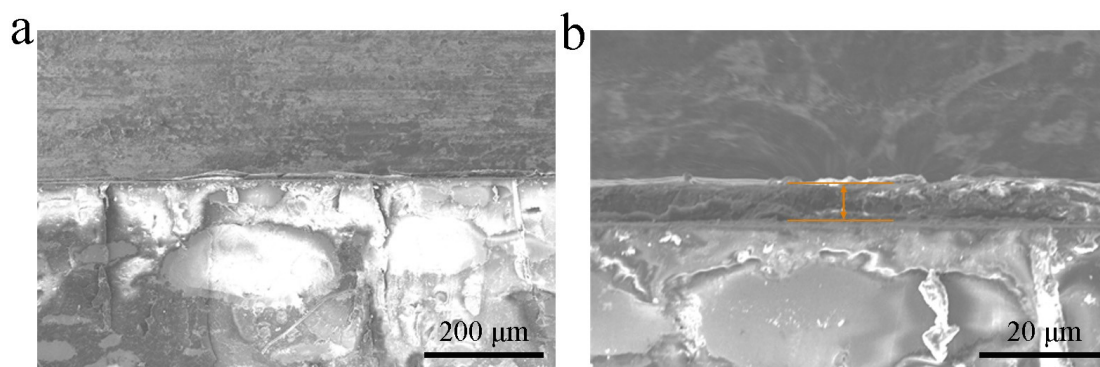

Fig. S2 Cross-sectional SEM images (a, b) of NPsmG under different magnification, arrow represents the coating.

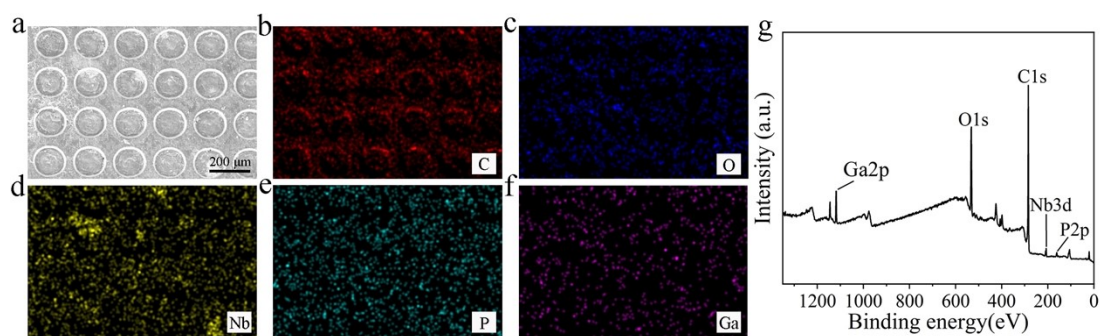

Fig. S3 SEM images (a) and EDS mapping images of elements of C (b), O (c), Nb (d), P (e) and Ga (f) distributed on the NPsmG surface, and XPS (g) of NPsmG.

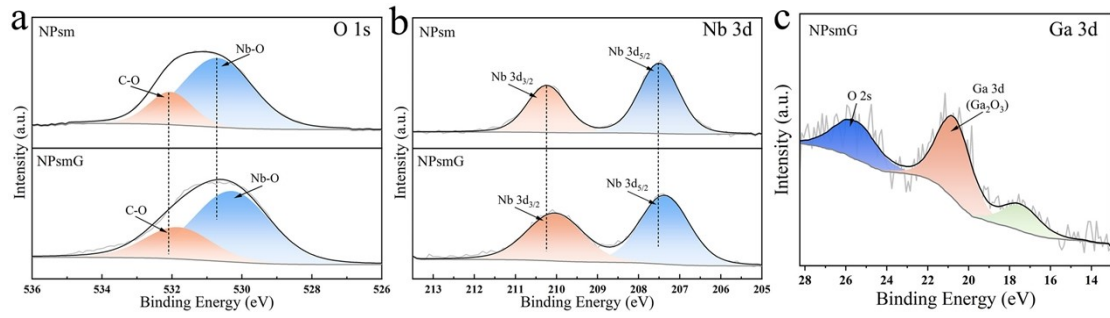

Fig. S4 High-resolution XPS of O 1s (a) and Nb 3d (b) of NPsm and NPsmG, and Ga 3d (c) of NPsmG.

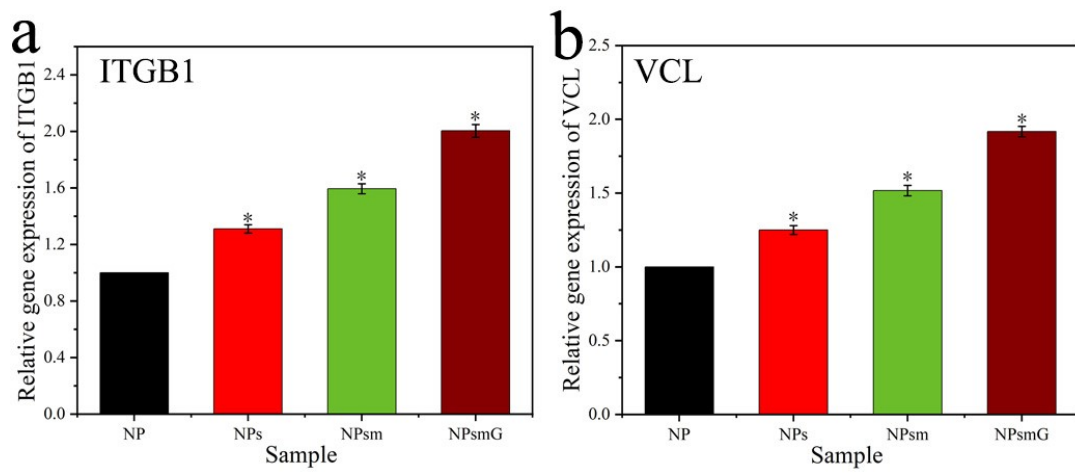

Fig. S5 Expressions of adhesion-related genes of TGB1 (a) and VCL (b) of BMSC cells cultured on different samples for 3 days.

**Table S1** Primer sequences of adhesion genes

| <b>Gene</b>  | <b>Primer sequences(5'-3')</b>                                     |
|--------------|--------------------------------------------------------------------|
| <i>GAPDH</i> | forward: GGAATCCACTGGCGTCTTCA<br>reverse: GGTTACGCCCATCACAAAC      |
| <i>ITGB1</i> | forward: ACATTGATGACTGCTGGTTCTA<br>reverse: AATAAGAACAATTCCGGCAACC |
| <i>VCL</i>   | forward: AGCAGGACCCAGGAGTTTATG<br>reverse: TGTGGCACTGAGAGGAGTTAG   |

**Table S2** Primer sequences of osteogenic genes

| <b>Gene</b>  | <b>Primer sequences(5'-3')</b>                                      |
|--------------|---------------------------------------------------------------------|
| <i>GAPDH</i> | forward: GGAATCCACTGGCGTCTTCA<br>reverse: GGTTACGCCCATCACAAAC       |
| <i>Runx2</i> | forward: TCTTCCCAAAGCCAGAGCG<br>reverse: TGCCATTTCGAGGTGGTC         |
| <i>ALP</i>   | forward: GACGTCTCCATGGTGGATTATGC<br>reverse: CCCAGGCACAGTGGTCAAG    |
| <i>OCN</i>   | forward: GCCCTGACTGCATTCTGCCTCT<br>reverse: TCACCACCTTACTGCCCTCCTG  |
| <i>OPN</i>   | forward: CCAAGCGTGGAAACACACAGCC<br>reverse: GGCTTTGGAACCTCGCCTGACTG |

**Table S3** Primer sequences of inflammatory genes

| <b>Gene</b>                    | <b>Primer sequences(5'-3')</b>                                       |
|--------------------------------|----------------------------------------------------------------------|
| <i>GAPDH</i>                   | forward: AGGTCGGTGTGTGAACGGATTTG<br>reverse: TGTAGACCATGTAGTTGAGGTCA |
| <i>CD206</i>                   | forward: TTCCATCGAGACTGCTGCTG<br>reverse: CCAGAGGGATCGCCTGTTTT       |
| <i>CCR7</i>                    | forward: ATGACGTACCTACAGCCTG<br>reverse: CAGCCCAAGTCCTTGAAGAG        |
| <i>IL-1<math>\beta</math></i>  | forward: TGGAGAGTGTGGATCCCAAG<br>reverse: GGTGCTGATGTACCAGTTGG       |
| <i>IL-4</i>                    | forward: GTCATCCTGCTCTTCTTTCTC<br>reverse: GAGTGCATGGCGTCCCTTCTC     |
| <i>IL-10</i>                   | forward: GAGAAGCATGGCCCAGAAATC<br>reverse: GAGAAATCGATGACAGCGCC      |
| <i>IL-6</i>                    | forward: ATAGTCCTTCTACCCCAATTTCC<br>reverse: GATGAATTGGATGGTCTTGGTCC |
| <i>TNF-<math>\alpha</math></i> | forward: CTGAACTTCGGGGTGATCGG                                        |

*iNOS*

reverse: GGCTTGTCACTCGAATTTTGAGA

forward: CACCAAGCTGAACTTGAGCG

reverse: CGTGGCTTTGGGCTCCTC

---

**Table S4** MIC and MBC of Ga<sup>3+</sup> of NPsmG against *E. coli* and *S. aureus*

| Bacteria         | MIC (mg/L) | MBC (mg/L) |
|------------------|------------|------------|
| <i>E. coli</i>   | 4          | 8          |
| <i>S. aureus</i> | 6          | 8          |
